# Supplementary material
Source: publisher site journal article supplement (https://www.dovepress.com/get_supplementary_file.php?f=343211.docx)
Supplement: Supplementary file 1 [file get_supplementary_file.php]

SUPPLEMENTARY DATA

Supplementary Table 1: Search strategy for MEDLINE (searched via Ovid SP platform on 1st April 2020)

| **Term group** | **Search #** | **Terms** | **Hits** |
| --- | --- | --- | --- |
| **Stigma** | 1 | exp social stigma/ or exp shame/ or stereotyping/ or self concept/ or public opinion/ or "patient acceptance of health care"/ or social discrimination/ or self efficacy/ or social perception/ or attitude/ | 212,432 |
| 2 | (stigma$ or shame$ or embarras$ or prejudic$ or stereotyp$ or discriminat$ or self-efficacy or self-esteem or self-concept or self-image or attitude$ or ((belief$ or view$ or experience$ or perspective$ or barrier$) adj5 (antipsycho$ or anti-psycho$ or neuroleptic$ or treatment$ or medication$))).tw. | 535,804 |
| 3 | 1 or 2 | 677,397 |
| **Indications** | 4 | exp psychotic disorders/ or exp "schizophrenia spectrum and other psychotic disorders"/ | 146,187 |
| 5 | (schizo$ or psycho$).tw. | 715,882 |
| 6 | exp "bipolar and related disorders"/ | 39,828 |
| 7 | ((bipolar adj3 disorder$) or depress$).tw. | 466,983 |
| 8 | (mania$ or manic$).tw. | 18,953 |
| 9 | exp depressive disorder/ or exp depression/ | 211,920 |
| 10 | ((major or clinical or melancholic or catatonic or atypical or unipolar or disorder$ or episod$) adj2 depress$).tw. | 74,281 |
| 11 | (unipolar disorder or MDD).tw. | 12,893 |
| 12 | Stress Disorders, Post-Traumatic/ | 31,889 |
| 13 | (PTSD or ((posttraumatic or post-traumatic) adj stress)).tw. | 35,495 |
| 14 | exp mood disorders/ or exp personality disorders/ | 156,966 |
| 15 | exp anxiety disorders/ | 78,464 |
| 16 | (AXIS-I or AXIS-1 or mood disorder$ or personality disorder$ or borderline personality or BPD or anxiety disorder$ or obsessive compulsive$ or OCD or GAD).tw. | 91,141 |
| 17 | or/4-16 | 1,235,265 |
| **Antipsychotics** | 18 | exp Antipsychotic Agents/ | 122,993 |
| 19 | (anti-psycho$ or antipsycho$ or neuroleptic$).tw. | 55,766 |
| 20 | (chlorpromazine or flupent?ixol or fluphenazine or haloperidol or levomepromazine or methotrimeprazine or peric?azine or properic?azine or perphenazine or amisulpride or aripiprazole or asenapine or brexpiprazole or cariprazine or RGH-188 or clozapine or iloperidone or lurasidone or olanzapine or paliperidone or quetiapine or risperidone or pimozide or prochlorperazine or sulpiride or thioridazine or trifluoperazine or zuclopenthixol or zuclopentixol or sertindole or ziprasidone or ziprazidone).tw. | 66,646 |
| 21 | chlorpromazine/ or flupenthixol/ or fluphenazine/ or haloperidol/ or methotrimeprazine/ or perphenazine/ or aripiprazole/ or clozapine/ or lurasidone hydrochloride/ or olanzapine/ or paliperidone palmitate/ or quetiapine fumarate/ or risperidone/ or pimozide/ or prochlorperazine/ or sulpiride/ or thioridazine/ or trifluoperazine/ | 63,258 |
| 22 | (thorazine$ or largactil$ or depixol$ or fluanxol$ or prolixin$ or modecate$ or moditen$ or haldol$ or nosinan$ or nozinan$ or levoprome$ or neuleptil$ or neulactil$ or trilafon$ or decentan$ or amazeo$ or amipride$ or amival$ or solian$ or soltus$ or sulpitac$ or sulprix$ or abilify$ or aripiprex$ or saphris$ or sycrest$ or rexulti$ or vraylar$ or clozaril$ or fazaclo$ or versacloz$ or fanapt$ or fanapta$ or zomaril$ or latuda$ or zyprexa$ or invega$ or xeplion$ or seroquel$ or risperdal$ or orap$ or compazine$ or stemzine$ or buccastem$ or stemetil$ or phenotil$ or dogmatil$ or dolmatil$ or eglonyl$ or espiride$ or prometar$ or sulpor$ or mellaril$ or melleril$ or eskazinyl$ or eskazine$ or jatroneural$ or modalina$ or stelazine$ or terfluzine$ or trifluoperaz$ or triftazin$ or cisordinol$ or clopixol$ or acuphase$ or serdolect$ or serlect$ or geodon$ or zeldox$ or zipwell$).tw. | 5,803 |
| 23 | or/18-22 | 154,837 |
| **Combination** | 24 | 3 and 17 and 23 | 3,289 |
| **Exclusion terms** | 25 | exp animals/ not exp humans/ | 4,685,189 |
| 26 | 24 not 25 | 2,882 |
| **Limit to last 10 years (2010-2020)** | 27 | limit 26 to yr=2010-2020 | **1,244** |

Footnotes: ‘$’ is a wildcard representing any string of characters; ‘/’ indicates that the term is part of a hierarchy of subject headings in Medline

Supplementary Table 2: Search strategy for Embase (searched via Ovid SP platform on 1st April 2020)

| **Term group** | **Search #** | **Searches** | **Results** |
| --- | --- | --- | --- |
| **Stigma** | 1 | exp stigma/ or exp social stigma/ or exp shame/ or stereotyping/ or self concept/ or public opinion/ or patient attitude/ or exp social discrimination/ or self esteem/ or attitude/ | 277,141 |
| 2 | (stigma$ or shame$ or embarras$ or prejudic$ or stereotyp$ or discriminat$ or self-efficacy or self-esteem or self-concept or self-image or attitude$ or ((belief$ or view$ or experience$ or perspective$ or barrier$) adj5 (antipsycho$ or anti-psycho$ or neuroleptic$ or treatment$ or medication$))).tw. | 677,027 |
| 3 | 1 or 2 | 837,041 |
| **Indications** | 4 | exp psychosis/ or exp schizophrenia spectrum disorder/ | 275,591 |
| 5 | (schizo$ or psycho$).tw. | 949,422 |
| 6 | exp bipolar disorder/ | 61,820 |
| 7 | ((bipolar adj3 disorder$) or psychosis$ or depress$).tw. | 667,346 |
| 8 | (mania$ or manic$).tw. | 25,718 |
| 9 | exp depression/ | 463,136 |
| 10 | ((major or clinical or melancholic or catatonic or atypical or unipolar or disorder$ or episod$) adj2 depress$).tw. | 102,727 |
| 11 | (unipolar disorder or MDD).tw. | 19,379 |
| 12 | posttraumatic stress disorder/ | 58,507 |
| 13 | (PTSD or ((posttraumatic or post-traumatic) adj stress)).tw. | 45,006 |
| 14 | exp mood disorder/ or exp personality disorder/ or borderline state/ | 545,840 |
| 15 | exp anxiety disorder/ | 235,601 |
| 16 | (AXIS-I or AXIS-1 or mood disorder$ or personality disorder$ or borderline personality or BPD or anxiety disorder$ or obsessive compulsive$ or OCD or GAD).tw. | 129,983 |
| 17 | or/4-16 | 1,715,107 |
| **Antipsychotics** | 18 | exp neuroleptic agent/ | 255,903 |
| 19 | (anti-psycho$ or antipsycho$ or neuroleptic$).tw. | 81,451 |
| 20 | (chlorpromazine or flupent?ixol or fluphenazine or haloperidol or levomepromazine or methotrimeprazine or peric?azine or properic?azine or perphenazine or amisulpride or aripiprazole or asenapine or brexpiprazole or cariprazine or RGH-188 or clozapine or iloperidone or lurasidone or olanzapine or paliperidone or quetiapine or risperidone or pimozide or prochlorperazine or sulpiride or thioridazine or trifluoperazine or zuclopenthixol or zuclopentixol or sertindole or ziprasidone or ziprazidone).tw. | 83,223 |
| 21 | chlorpromazine/ or flupentixol/ or fluphenazine/ or haloperidol/ or levomepromazine/ or exp periciazine/ or perphenazine/ or aripiprazole/ or asenapine/ or brexpiprazole/ or cariprazine/ or clozapine/ or iloperidone/ or lurasidone/ or olanzapine/ or paliperidone/ or quetiapine/ or risperidone/ or pimozide/ or prochlorperazine/ or sulpiride/ or thioridazine/ or trifluoperazine/ or sertindole/ or ziprasidone/ | 165,931 |
| 22 | (thorazine$ or largactil$ or depixol$ or fluanxol$ or prolixin$ or modecate$ or moditen$ or haldol$ or nosinan$ or nozinan$ or levoprome$ or neuleptil$ or neulactil$ or trilafon$ or decentan$ or amazeo$ or amipride$ or amival$ or solian$ or soltus$ or sulpitac$ or sulprix$ or abilify$ or aripiprex$ or saphris$ or sycrest$ or rexulti$ or vraylar$ or clozaril$ or fazaclo$ or versacloz$ or fanapt$ or fanapta$ or zomaril$ or latuda$ or zyprexa$ or invega$ or xeplion$ or seroquel$ or risperdal$ or orap$ or compazine$ or stemzine$ or buccastem$ or stemetil$ or phenotil$ or dogmatil$ or dolmatil$ or eglonyl$ or espiride$ or prometar$ or sulpor$ or mellaril$ or melleril$ or eskazinyl$ or eskazine$ or jatroneural$ or modalina$ or stelazine$ or terfluzine$ or trifluoperaz$ or triftazin$ or cisordinol$ or clopixol$ or acuphase$ or serdolect$ or serlect$ or geodon$ or zeldox$ or zipwell$).tw. | 17,096 |
| 23 | or/18-22 | 272,475 |
| **Combination** | 24 | 3 and 17 and 23 | 7,277 |
| **Exclusion terms** | 25 | (conference abstract or conference review).pt. | 3,753,522 |
| 26 | limit 25 to yr="1974-2016" | 2,637,802 |
| 27 | exp animals/ not exp humans/ | 4,608,291 |
| 28 | 26 or 27 | 7,006,382 |
| 29 | 24 not 28 | 5,618 |
| **Limit to last 10 years (2010-2020)** | 30 | limit 29 to yr=2010-2020 | **2,772** |

Footnotes: ‘$’ is a wildcard representing any string of characters; ‘/’ indicates the term is part of a hierarchy of subject headings in Embase

Supplementary Table 3: Search strategy for PsycINFO (searched via APA PsycNet platform on 13th May 2020)

| **Term group** | **Terms** | **Search in** | **Combination** | **Hits** |
| --- | --- | --- | --- | --- |
| **Stigma** | "stigma" OR "self-stigma" OR "mental health stigma" OR "shame" OR "stereotyped attitudes" OR "self-concept" OR "public opinion" OR "social acceptance" OR "social discrimination" OR "self-efficacy" OR "social perception" OR "social approval" OR "attitudes" OR "self-esteem" | Index Terms | All lines combined using “OR” operator | 674,987 |
| (stigma* OR shame* OR embarras* OR prejudic* OR stereotyp* OR discriminat* OR self-efficacy OR self-esteem OR self-concept OR self-image OR attitude* OR ((belief* OR view* OR experience* OR perspective* OR barrier*) NEAR/5 (antipsycho* OR anti-psycho* OR neuroleptic* OR treatment* OR medication*))) | Title |
| (stigma* OR shame* OR embarras* OR prejudic* OR stereotyp* OR discriminat* OR self-efficacy OR self-esteem OR self-concept OR self-image OR attitude* OR ((belief* OR view* OR experience* OR perspective* OR barrier*) NEAR/5 (antipsycho* OR anti-psycho* OR neuroleptic* OR treatment* OR medication*))) | Abstract |
| **Indications 1** | "psychosis" OR "schizophrenia" OR "schizoaffective disorder" OR "schizophreniform disorder" OR "Acute Schizophrenia" OR "Catatonic Schizophrenia" OR "Paranoid Schizophrenia" OR "Process Schizophrenia" OR "Schizophrenia (Disorganized Type)" OR "Undifferentiated Schizophrenia" OR "Acute Psychosis" OR "Capgras Syndrome" OR "Chronic Psychosis" OR "Hallucinosis" OR "Paranoia (Psychosis)" OR "Postpartum Psychosis" OR "Reactive Psychosis" OR "Senile Psychosis" OR "affective psychosis" | Index Terms | All lines combined using “OR” operator | 375,159 |
| schizo* OR psychos* OR psychot* | Title |
| schizo* OR psychos* OR psychot* | Abstract |
| "bipolar disorder" OR "Bipolar I Disorder" OR "Bipolar II Disorder" OR "Cyclothymic Disorder" OR "Mania" | Index Terms |
| **Indications 2** | (bipolar NEAR/3 (disorder* or depress*)) | Title | N/A | 15,840 |
| **Indications 3** | (bipolar NEAR/3 (disorder* or depress*)) | Abstract | All lines combined using “OR” operator | 291,421 |
| Mania* OR manic* | Title |
| Mania* OR manic* | Abstract |
| "major depression" OR "Atypical Depression" OR "Dysthymic Disorder" OR "Endogenous Depression" OR "Late Life Depression" OR "Postpartum Depression" OR "Reactive Depression" OR "Recurrent Depression" OR "Treatment Resistant Depression" | Index Terms |
| ((major OR clinical OR melancholic OR catatonic OR atypical OR unipolar OR disorder* OR episode*) NEAR/2 depress*) | Title |
| ((major OR clinical OR melancholic OR catatonic OR atypical OR unipolar OR disorder* OR episode*) NEAR/2 depress*) | Abstract |
| "unipolar disorder" OR MDD | Title |
| "unipolar disorder" OR MDD | Abstract |
| "Posttraumatic Stress Disorder" OR "Complex PTSD" OR "DESNOS" | Index Terms |
| (PTSD OR ((posttraumatic OR post-traumatic) NEAR/1 stress)) | Title |
| (PTSD OR ((posttraumatic OR post-traumatic) NEAR/1 stress)) | Abstract |
| "affective disorders" OR "Seasonal Affective Disorder" OR "borderline personality disorder" | Index Terms |
| "Anxiety Disorders" OR "Panic Attack" OR "Panic Disorder" OR "Phobias" OR "Obsessive Compulsive Disorder" OR "Generalized Anxiety Disorder" | Index Terms |
| AXIS-I OR AXIS-1 OR "mood disorder*" OR "personality disorder*" OR "borderline personality" OR BPD OR "anxiety disorder*" OR "obsessive compulsive*" OR OCD OR GAD | Title |
| AXIS-I OR AXIS-1 OR "mood disorder*" OR "personality disorder*" OR "borderline personality" OR BPD OR "anxiety disorder*" OR "obsessive compulsive*" OR OCD OR GAD | Abstract |
| **Antipsychotics** | "neuroleptic drugs" | Index Terms | All lines combined using “OR” operator | 60,400 |
| anti-psycho* OR antipsycho* or neuroleptic* | Title |
| anti-psycho* OR antipsycho* or neuroleptic* | Abstract |
| chlorpromazine OR flupent?ixol OR fluphenazine OR haloperidol OR levomepromazine OR methotrimeprazine OR peric?azine OR properic?azine OR perphenazine OR amisulpride OR aripiprazole OR asenapine OR brexpiprazole OR cariprazine OR RGH-188 OR clozapine OR iloperidone OR lurasidone OR olanzapine OR paliperidone OR quetiapine OR risperidone OR pimozide OR prochlorperazine OR sulpiride OR thioridazine OR trifluoperazine OR zuclopenthixol OR zuclopentixol OR sertindole OR ziprasidone OR ziprazidone | Title |
| chlorpromazine OR flupent?ixol OR fluphenazine OR haloperidol OR levomepromazine OR methotrimeprazine OR peric?azine OR properic?azine OR perphenazine OR amisulpride OR aripiprazole OR asenapine OR brexpiprazole OR cariprazine OR RGH-188 OR clozapine OR iloperidone OR lurasidone OR olanzapine OR paliperidone OR quetiapine OR risperidone OR pimozide OR prochlorperazine OR sulpiride OR thioridazine OR trifluoperazine OR zuclopenthixol OR zuclopentixol OR sertindole OR ziprasidone OR ziprazidone | Abstract |
| "Chlorpromazine" OR "Fluphenazine" OR "Haloperidol" OR "Perphenazine" OR "Aripiprazole" OR "Clozapine" OR "Olanzapine" OR "Quetiapine" OR "Risperidone" OR "Pimozide" OR "Prochlorperazine" OR "Sulpiride" OR "Thioridazine" OR "Trifluoperazine" | Index Terms |
| thorazine* OR largactil* OR depixol* OR fluanxol* OR prolixin* OR modecate* OR moditen* OR haldol* OR nosinan* OR nozinan* OR levoprome* OR neuleptil* OR neulactil* OR trilafon* OR decentan* OR amazeo* OR amipride* OR amival* OR solian* OR soltus* OR sulpitac* OR sulprix* OR abilify* OR aripiprex* OR saphris* OR sycrest* OR rexulti* OR vraylar* OR clozaril* OR fazaclo* OR versacloz* OR fanapt* OR fanapta* OR zomaril* OR latuda* OR zyprexa* OR invega* OR xeplion* OR seroquel* OR risperdal* OR orap* OR compazine* OR stemzine* OR buccastem* OR stemetil* OR phenotil* OR dogmatil* OR dolmatil* OR eglonyl* OR espiride* OR prometar* OR sulpor* OR mellaril* OR melleril* OR eskazinyl* OR eskazine* OR jatroneural* OR modalina* OR stelazine* OR terfluzine* OR trifluoperaz* OR triftazin* OR cisordinol* OR clopixol* OR acuphase* OR serdolect* OR serlect* OR geodon* OR zeldox* OR zipwell* | Title |
| thorazine* OR largactil* OR depixol* OR fluanxol* OR prolixin* OR modecate* OR moditen* OR haldol* OR nosinan* OR nozinan* OR levoprome* OR neuleptil* OR neulactil* OR trilafon* OR decentan* OR amazeo* OR amipride* OR amival* OR solian* OR soltus* OR sulpitac* OR sulprix* OR abilify* OR aripiprex* OR saphris* OR sycrest* OR rexulti* OR vraylar* OR clozaril* OR fazaclo* OR versacloz* OR fanapt* OR fanapta* OR zomaril* OR latuda* OR zyprexa* OR invega* OR xeplion* OR seroquel* OR risperdal* OR orap* OR compazine* OR stemzine* OR buccastem* OR stemetil* OR phenotil* OR dogmatil* OR dolmatil* OR eglonyl* OR espiride* OR prometar* OR sulpor* OR mellaril* OR melleril* OR eskazinyl* OR eskazine* OR jatroneural* OR modalina* OR stelazine* OR terfluzine* OR trifluoperaz* OR triftazin* OR cisordinol* OR clopixol* OR acuphase* OR serdolect* OR serlect* OR geodon* OR zeldox* OR zipwell* | Abstract |
| **Final combination** | **Stigma** AND (**Indications 1** OR **Indications 2** OR **Indications 3**) AND **Antipsychotics** | | | **1,131** |

Footnotes: ‘*’ is a wildcard representing any string of characters

Supplementary Table 4: Search strategy for CDSR and CENTRAL (searched via Wiley Online platform on 1st April 2020)

| Term group | Search # | Search | Hits |
| --- | --- | --- | --- |
| Stigma | 1 | MeSH descriptor: [Social Stigma] explode all trees | 215 |
| 2 | MeSH descriptor: [Shame] explode all trees | 54 |
| 3 | MeSH descriptor: [Stereotyping] this term only | 345 |
| 4 | MeSH descriptor: [Self Concept] this term only | 2,301 |
| 5 | MeSH descriptor: [Public Opinion] this term only | 81 |
| 6 | MeSH descriptor: [Patient Acceptance of Health Care] this term only | 2,840 |
| 7 | MeSH descriptor: [Social Discrimination] this term only | 14 |
| 8 | MeSH descriptor: [Self Efficacy] this term only | 2,980 |
| 9 | MeSH descriptor: [Social Perception] this term only | 812 |
| 10 | MeSH descriptor: [Attitude] this term only | 1,018 |
| 11 | (stigma* or shame* or embarras* or prejudic* or stereotyp* or discriminat* or self-efficacy or self-esteem or self-concept or self-image or attitude* or ((belief* or view* or experience* or perspective* or barrier*) NEAR/5 (antipsycho* or anti-psycho* or neuroleptic* or treatment* or medication*))):ti,ab,kw | 57,235 |
| 12 | {OR #1-#11} | 59,780 |
| Indications | 13 | MeSH descriptor: [Psychotic Disorders] explode all trees | 2,902 |
| 14 | MeSH descriptor: [Schizophrenia Spectrum and Other Psychotic Disorders] explode all trees | 8,943 |
| 15 | (schizo* or psycho*):ti,ab,kw | 140,563 |
| 16 | MeSH descriptor: [undefined] explode all trees | 0 |
| 17 | (bipolar NEAR/3 disorder* or depress*):ti,ab,kw | 83,698 |
| 18 | (mania* or manic*):ti,ab,kw | 3,166 |
| 19 | MeSH descriptor: [Depressive Disorder] explode all trees | 11,834 |
| 20 | MeSH descriptor: [Depression] explode all trees | 11,708 |
| 21 | ((major or clinical or melancholic or catatonic or atypical or unipolar or disorder* or episod*) NEAR/2 depress*):ti,ab,kw | 22,810 |
| 22 | ("unipolar disorder" or MDD):ti,ab,kw | 3,384 |
| 23 | MeSH descriptor: [Stress Disorders, Post-Traumatic] this term only | 2,480 |
| 24 | (PTSD or ((posttraumatic or post-traumatic) NEXT stress)):ti,ab,kw | 5,469 |
| 25 | MeSH descriptor: [Mood Disorders] explode all trees | 12,503 |
| 26 | MeSH descriptor: [Personality Disorders] explode all trees | 1,340 |
| 27 | MeSH descriptor: [Anxiety Disorders] explode all trees | 6,658 |
| 28 | (AXIS-I or AXIS-1 or "mood disorder*" or "personality disorder*" or "borderline personality" or BPD or "anxiety disorder*" or "obsessive compulsive*" or OCD or GAD):ti,ab,kw | 14,313 |
| 29 | {OR #13-#28} | 197,185 |
| Antipsychotics | 30 | MeSH descriptor: [Antipsychotic Agents] explode all trees | 4,541 |
| 31 | (anti-psycho* or antipsycho* or neuroleptic*):ti,ab,kw | 10,859 |
| 32 | (chlorpromazine or flupentixol or flupenthixol or fluphenazine or haloperidol or levomepromazine or methotrimeprazine or pericyazine or periciazine or propericyazine or propericiazine or perphenazine or amisulpride or aripiprazole or asenapine or brexpiprazole or cariprazine or RGH-188 or clozapine or iloperidone or lurasidone or olanzapine or paliperidone or quetiapine or risperidone or pimozide or prochlorperazine or sulpiride or thioridazine or trifluoperazine or zuclopenthixol or zuclopentixol or sertindole or ziprasidone or ziprazidone):ti,ab,kw | 14,506 |
| 33 | [mh ^Chlorpromazine] or [mh ^Flupenthixol] or [mh ^Fluphenazine] or [mh ^Haloperidol] or [mh ^Methotrimeprazine] or [mh ^Perphenazine] or [mh ^Aripiprazole] or [mh ^Clozapine] or [mh ^"Lurasidone Hydrochloride"] or [mh ^Olanzapine] or [mh ^"Paliperidone Palmitate"] or [mh ^"Quetiapine Fumarate"] or [mh ^Risperidone] or [mh ^Pimozide] or [mh ^Prochlorperazine] or [mh ^Sulpiride] or [mh ^Thioridazine] or [mh ^Trifluoperazine] | 6,205 |
| 34 | (thorazine* or largactil* or depixol* or fluanxol* or prolixin* or modecate* or moditen* or haldol* or nosinan* or nozinan* or levoprome* or neuleptil* or neulactil* or trilafon* or decentan* or amazeo* or amipride* or amival* or solian* or soltus* or sulpitac* or sulprix* or abilify* or aripiprex* or saphris* or sycrest* or rexulti* or vraylar* or clozaril* or fazaclo* or versacloz* or fanapt* or fanapta* or zomaril* or latuda* or zyprexa* or invega* or xeplion* or seroquel* or risperdal* or orap* or compazine* or stemzine* or buccastem* or stemetil* or phenotil* or dogmatil* or dolmatil* or eglonyl* or espiride* or prometar* or sulpor* or mellaril* or melleril* or eskazinyl* or eskazine* or jatroneural* or modalina* or stelazine* or terfluzine* or trifluoperaz* or triftazin* or cisordinol* or clopixol* or acuphase* or serdolect* or serlect* or geodon* or zeldox* or zipwell*):ti,ab,kw | 1,021 |
| 35 | {OR #30-#34} | 19,048 |
| Combination | 36 | #12 and #29 and #35 | 741 |
| Limit to last 10 years (2010-2020) | 37 | #36 with Cochrane Library publication date Between Jan 2010 and Apr 2020, in Cochrane Reviews, Cochrane Protocols | **35** |
| 38 | #36 with Publication Year from 2010 to 2020, in Trials | **371** |
| 39 | #37 or #38 | **406** |

Footnotes: ‘*’ is a wildcard representing any string of characters; ^ limits a search to specific subject headings

Supplementary Table 5: Search strategy for DARE (searched via University of York CRD platform on 1st April 2020)

| **Term group** | **Search #** | **Terms** | **Hits** |
| --- | --- | --- | --- |
| **Stigma** |  | MeSH DESCRIPTOR Social Stigma EXPLODE ALL TREES | 8 |
|  | MeSH DESCRIPTOR Shame EXPLODE ALL TREES | 1 |
|  | MeSH DESCRIPTOR Stereotyping EXPLODE ALL TREES | 6 |
|  | MeSH DESCRIPTOR Self Concept | 62 |
|  | MeSH DESCRIPTOR Public Opinion | 13 |
|  | MeSH DESCRIPTOR Patient Acceptance of Health Care | 242 |
|  | MeSH DESCRIPTOR Social Discrimination | 1 |
|  | MeSH DESCRIPTOR Self Efficacy | 61 |
|  | MeSH DESCRIPTOR Social Perception | 11 |
|  | MeSH DESCRIPTOR Attitude | 16 |
|  | (stigma* or shame* or embarras* or prejudic* or stereotyp* or discriminat* or self-efficacy or self-esteem or self-concept or self-image or attitude*) | 1,756 |
|  | (belief* or view* or experience* or perspective* or barrier*) NEAR5 (antipsycho* or anti-psycho* or neuroleptic* or treatment* or medication*) | 321 |
|  | (antipsycho* or anti-psycho* or neuroleptic* or treatment* or medication*) NEAR5 (belief* or view* or experience* or perspective* or barrier*) | 428 |
|  | #1 OR #2 OR #3 OR #4 OR #5 OR #6 OR #7 OR #8 OR #9 OR #10 OR #11 OR #12 OR #13 | 2,617 |
| **Indications** |  | MeSH DESCRIPTOR Psychotic Disorders EXPLODE ALL TREES | 163 |
|  | MeSH DESCRIPTOR Schizophrenia Spectrum and Other Psychotic Disorders EXPLODE ALL TREES | 647 |
|  | schizo* or psycho* | 6,982 |
|  | MeSH DESCRIPTOR Bipolar and Related Disorders EXPLODE ALL TREES | 190 |
|  | bipolar NEAR3 (disorder* or depress*) | 344 |
|  | (disorder* or depress*) NEAR3 bipolar | 104 |
|  | (mania* or manic*) | 173 |
|  | MeSH DESCRIPTOR Depressive Disorder EXPLODE ALL TREES | 1,030 |
|  | MeSH DESCRIPTOR Depression EXPLODE ALL TREES | 639 |
|  | (major or clinical or melancholic or catatonic or atypical or unipolar or disorder* or episod*) NEAR2 depress* | 745 |
|  | depress* NEAR2 (major or clinical or melancholic or catatonic or atypical or unipolar or disorder* or episod*) | 1,205 |
|  | (unipolar disorder or MDD) | 52 |
|  | MeSH DESCRIPTOR Stress Disorders, Post-Traumatic EXPLODE ALL TREES | 139 |
|  | PTSD | 106 |
|  | (posttraumatic or post-traumatic) NEAR1 stress | 199 |
|  | stress NEAR1 (posttraumatic or post-traumatic) | 0 |
|  | MeSH DESCRIPTOR Mood Disorders EXPLODE ALL TREES | 1,064 |
|  | MeSH DESCRIPTOR Personality Disorders EXPLODE ALL TREES | 69 |
|  | MeSH DESCRIPTOR Anxiety Disorders EXPLODE ALL TREES | 380 |
|  | (AXIS-I or AXIS-1 or mood disorder* or personality disorder* or borderline personality or BPD or anxiety disorder* or obsessive compulsive* or OCD or GAD) | 744 |
|  | #15 OR #16 OR #17 OR #18 OR #19 OR #20 OR #21 OR #22 OR #23 OR #24 OR #25 OR #26 OR #27 OR #28 OR #29 OR #30 OR #31 OR #32 OR #33 OR #34 | 8,063 |
| **Antipsychotics** |  | MeSH DESCRIPTOR Antipsychotic Agents EXPLODE ALL TREES | 720 |
|  | (anti-psycho* or antipsycho* or neuroleptic*) | 907 |
|  | (chlorpromazine or flupentixol or flupenthixol or fluphenazine or haloperidol or levomepromazine or methotrimeprazine or pericyazine or periciazine or propericyazine or propericiazine or perphenazine or amisulpride or aripiprazole or asenapine or brexpiprazole or cariprazine or RGH-188 or clozapine or iloperidone or lurasidone or olanzapine or paliperidone or quetiapine or risperidone or pimozide or prochlorperazine or sulpiride or thioridazine or trifluoperazine or zuclopenthixol or zuclopentixol or sertindole or ziprasidone or ziprazidone) | 698 |
|  | MeSH DESCRIPTOR Chlorpromazine | 14 |
|  | MeSH DESCRIPTOR flupenthixol | 4 |
|  | MeSH DESCRIPTOR fluphenazine | 4 |
|  | MeSH DESCRIPTOR haloperidol | 58 |
|  | MeSH DESCRIPTOR methotrimeprazine | 0 |
|  | MeSH DESCRIPTOR perphenazine | 3 |
|  | MeSH DESCRIPTOR aripiprazole | 34 |
|  | MeSH DESCRIPTOR clozapine | 69 |
|  | MeSH DESCRIPTOR lurasidone hydrochloride | 5 |
|  | MeSH DESCRIPTOR paliperidone palmitate | 12 |
|  | MeSH DESCRIPTOR quetiapine fumarate | 45 |
|  | MeSH DESCRIPTOR risperidone | 121 |
|  | MeSH DESCRIPTOR pimozide | 1 |
|  | MeSH DESCRIPTOR prochlorperazine | 4 |
|  | MeSH DESCRIPTOR sulpiride | 15 |
|  | MeSH DESCRIPTOR thioridazine | 0 |
|  | MeSH DESCRIPTOR trifluoperazine | 0 |
|  | (thorazine* or largactil* or depixol* or fluanxol* or prolixin* or modecate* or moditen* or haldol* or nosinan* or nozinan* or levoprome* or neuleptil* or neulactil* or trilafon* or decentan* or amazeo* or amipride* or amival* or solian* or soltus* or sulpitac* or sulprix* or abilify* or aripiprex* or saphris* or sycrest* or rexulti* or vraylar* or clozaril* or fazaclo* or versacloz* or fanapt* or fanapta* or zomaril* or latuda* or zyprexa* or invega* or xeplion* or seroquel* or risperdal* or orap* or compazine* or stemzine* or buccastem* or stemetil* or phenotil* or dogmatil* or dolmatil* or eglonyl* or espiride* or prometar* or sulpor* or mellaril* or melleril* or eskazinyl* or eskazine* or jatroneural* or modalina* or stelazine* or terfluzine* or trifluoperaz* or triftazin* or cisordinol* or clopixol* or acuphase* or serdolect* or serlect* or geodon* or zeldox* or zipwell*) | 54 |
|  | #36 OR #37 OR #38 OR #39 OR #40 OR #41 OR #42 OR #43 OR #44 OR #45 OR #46 OR #47 OR #48 OR #49 OR #50 OR #51 OR #52 OR #53 OR #54 OR #55 OR #56 | 1,118 |
| **Combination** |  | #14 and #35 and #57 | **64** |
|  | #58 in DARE, Publication year 2010‒2020 | **14** |
|  | #58 in DARE, Publication year 2000‒2009 | **22** |

Footnotes: ‘*’ is a wildcard representing any string of characters

Supplementary Table 6: Search strategy for congress proceedings

| Conference | Link | Search strategy |
| --- | --- | --- |
| Psych Congress   - 2019 - 2018 - 2017 | <https://www.psychcongress.com/pub/722/324170/meeting-materials> | ‘Conference year’ was selected from the drop-down box under Year, and ‘Poster’ was selected from the drop-down box under Content type. Each of the following search terms were searched one by one in the title box:   1. stigma 2. shame 3. embarras 4. prejudic 5. stereotyp 6. discriminat 7. self-efficacy 8. self-esteem 9. self-image 10. self-concept 11. antipsychotic 12. adherence 13. compliance |
| American Psychiatric Association (APA)   - 2020 (April) - 2019 - 2018 - 2017 | Abstract booklets | Ctrl + f function was used to search for the following terms in turn:   1. stigma 2. shame 3. embarras 4. prejudic 5. stereotyp 6. discriminat 7. self efficacy 8. self esteem 9. self image 10. self concept   For each abstract that comes up with each search term, highlight one word of the title (use a different colour for different search terms) |
| European College of Neuropsychopharmacology (ECNP)   - 2019 - 2018 - 2017 | **2019:** <https://www.ecnp.eu/about-ecnp/history/past-ecnp-meetings/past-congresses/Copenhagen2019/Programme#!sessionschedule>  **2018 and 2017:** Abstract booklets | **2019:** The following approach was used: Click ‘filter options’, then click ‘session types’, then select ‘poster session’. Click ‘word(s) in the presentation title/text’, paste in the search term below, then click ‘apply to abstract list’. Repeat for each of the terms in the list.   1. stigma 2. shame 3. embarrassment 4. embarrassing 5. prejudice 6. prejudicial 7. stereotype 8. stereotyping 9. discrimination 10. discriminatory 11. self-efficacy 12. self-esteem 13. self-image 14. self-concept   **2018 and 2017:** The poster titles were in PDF form, the ‘ctrl + f’ function was used to search for the following terms in turn:   1. stigma 2. shame 3. embarras 4. prejudic 5. stereotyp 6. discriminat 7. self efficacy 8. self esteem 9. self image 10. self concept   For 2018 and 2017, initial sifting was based on the title only. Google was used to look for abstracts/posters of potentially relevant records |
| International College of Neuropsychopharmacology (CINP)   - 2019 - 2018 - 2017 | Abstract booklets | Ctrl + f function was used to search for the following terms in turn:   1. stigma 2. shame 3. embarras 4. prejudic 5. stereotyp 6. discriminat 7. self efficacy 8. self esteem 9. self image 10. self concept |
| American Society of Clinical Psychopharmacology (ASCP)   - 2020 (May) - 2019 - 2018 - 2017 | Abstract booklets | Ctrl + f function was used to search for the following terms in turn:   1. stigma 2. shame 3. embarras 4. prejudic 5. stereotyp 6. discriminat 7. self efficacy 8. self esteem 9. self image 10. self concept |
| American College of Neuropsychopharmacology (ACNP)   - 2019 - 2018 - 2017 | Abstract booklets | Ctrl + f function was used to search for the following terms in turn:   1. stigma 2. shame 3. embarras 4. prejudic 5. stereotyp 6. discriminat 7. self efficacy 8. self esteem 9. self image 10. self concept |
| College of Psychiatric and Neurologic Pharmacists (CPNP)   - 2019 - 2018 | Abstract booklets | Ctrl + f function was used to search for the following terms in turn:   1. stigma 2. shame 3. embarras 4. prejudic 5. stereotyp 6. discriminat 7. self efficacy 8. self esteem 9. self image 10. self concept |
| European Psychiatric Association (EPA)   - 2019 - 2018 - 2017 | Abstract booklets | The poster abstracts were in pdf form, so the ‘ctrl + f’ function was used to search for the following terms in turn:   1. stigma 2. shame 3. embarras 4. prejudic 5. stereotyp 6. discriminat 7. self efficacy 8. self esteem 9. self image 10. self concept |
| Schizophrenia International Research Society (SIRS)   - 2019 - 2018 | Poster abstracts: 2019:  <https://schizophreniaresearchsociety.org/meetings/past-meetings/>  Poster abstracts 2018:  <https://academic.oup.com/schizophreniabulletin/issue/44/suppl_1> | For **2019**, ‘Abstracts’ for the relevant year under the heading 'Past Meetings' were searched. Ctrl +f function was used to search the terms given below.  For **2018**, 'ctrl +f' function was used to search the following terms in turn:   1. stigma 2. shame 3. embarras 4. prejudic 5. stereotyp 6. discriminat 7. self efficacy 8. self esteem 9. self image 10. self concept |

Supplementary Table 7: Search strategy for ClinicalTrials.gov

| Term group | Search terms |
| --- | --- |
| Condition or disease | - |
| Other terms | Stigma OR shame OR embarrassment or prejudice OR stereotype OR discrimination OR self-concept OR self-efficacy OR self-esteem OR self-image |
| Recruitment status | All |
| Study type, study results | All Studies |
| Intervention/treatment | **Search 1:**  Neuroleptic OR antipsychotic OR antipsychotic agent OR antipsychotic atypical OR Chlorpromazine OR Flupentixol OR Flupenthixol OR Fluphenazine OR Haloperidol OR Levomepromazine OR Methotrimeprazine OR Periciazine OR Pericyazine  **Search 2:**  Propericiazine OR Propericyazine OR perphenazine OR amisulpride OR aripiprazole OR asenapine OR brexpiprazole OR cariprazine OR RGH-188 OR Clozapine OR Iloperidone OR Lurasidone OR lurasidone hydrochloride OR Olanzapine  **Search 3:**  Paliperidone OR paliperidone palmitate OR Quetiapine OR quetiapine fumarate OR Risperidone OR Pimozide OR Prochlorperazine OR Sulpiride OR Thioridazine OR Trifluoperazine OR Zuclopenthixol OR Zuclopentixol OR Sertindole OR Ziprasidone OR Ziprazidone  **Search 4:**  Thorazine OR largactil OR depixol OR fluanxol OR prolixin OR modecate OR moditen OR haldol OR nosinan OR nozinan OR levoprome OR neuleptil OR neulactil OR trilafon OR decentan  **Search 5:**  amazeo OR amipride OR amival OR solian OR soltus OR sulpitac OR sulprix OR abilify OR aripiprex OR saphris OR sycrest OR rexulti OR vraylar OR clozaril OR fazaclo  **Search 6:**  versacloz OR fanapt OR fanapta OR zomaril OR latuda OR zyprexa OR invega OR xeplion OR seroquel OR risperdal OR orap OR compazine OR stemzine OR buccastem OR stemetil  **Search 7:**  phenotil OR dogmatil OR dolmatil OR eglonyl OR espiride OR prometar OR sulpor OR mellaril OR melleril OR eskazinyl OR eskazine OR jatroneural OR modalina OR stelazine OR terfluzine  **Search 8:**  trifluoperaz OR triftazin OR cisordinol OR clopixol OR acuphase OR serdolect OR serlect OR geodon OR zeldox OR zipwell |
| First posted | Any Time |

Supplementary Table 8: Search strategy for PsychU.org

| **Term group** | **Search terms** |
| --- | --- |
| **Topic filter** | Stigma |
| **Medium filter** | Article |
| **Reference** | Peer-reviewed publication |

Supplementary Table 9: Full eligibility criteria for the SLR

| **Domain** | **Inclusion criteria** | **Exclusion criteria** |
| --- | --- | --- |
| **Sample** | Adults (≥18 years) with any of the following conditions:   - Psychotic disorders (e.g. psychosis, schizophrenia or related disorders such as schizoaffective disorder) - Mood disorders with or without accompanying psychosis (e.g. MDD or bipolar disorder) - Borderline personality disorder - Anxiety disorders (e.g. generalised anxiety disorder, obsessive compulsive disorder or post-traumatic stress disorder)   Healthcare providers (HCPs), caregivers or members of the general public interacting with or expressing an opinion on patients with these conditions | - Adults with any other condition - Children (<18 years) |
| Adults with any of the following conditions were ineligible regardless of whether they were receiving antipsychotic treatment or were described as candidates for antipsychotic treatment: eating disorders, substance abuse disorders, attention deficit hyperactivity disorder, Alzheimer’s disease, any paediatric conditions or developmental disorders | |
| **Phenomenon of Interest** | Stigmatising attitudes and behaviours related to antipsychotic treatment or to the side effects of antipsychotic treatment, and the impact of these on use of antipsychotics, including:   - Patient willingness to seek treatment - Clinician willingness to recommend and prescribe a specific treatment - Patient willingness to accept this recommendation prior to receiving a prescription - Patient adherence after receiving a prescription (e.g. filling a prescription, taking their medication on schedule and as prescribed, remaining on treatment) | - Stigmatising attitudes and behaviours related to any other pharmacologic or non-pharmacologic treatment - Stigmatising attitudes and behaviours related to the psychiatric disorder that are not specifically associated with antipsychotic treatment or the side effects of antipsychotic treatment (e.g. the stigma associated with having a psychiatric diagnosis) |
| **Study designa** | - Interventional studies (RCTs or non-RCTs) - Observational studies (prospective, retrospective or cross-sectional) - Qualitative studies (e.g. semi-structured interviews, focus group reports) - Vignette studies | - Secondary publication types (see “Research Type” below) - Case reports |
| **Evaluation (relevant outcomes)** | Relevant outcomes included (but were not limited to):   - Quantitative outcomes - Proportion of patients experiencing treatment-related social stigma or self-stigma - Outputs from relevant quantitative stigma scales - Quantitative measures of the association between choice of antipsychotic and measures of stigma - Reduction in number of prescriptions or treatment adherence due to stigma - Qualitative outcomes - Qualitative descriptions of types of medication-related stigma, including direct relationships (e.g. use of antipsychotics perceived as evidence of disability) and indirect relationships (e.g. side effects of antipsychotics leading to stigma) - Qualitative descriptions of the impact of stigma on clinician recommendations/prescriptions, patient acceptance of clinician recommendations or patient treatment adherence   Outcomes could be reported from the perspective of patients, healthcare professionals, caregivers or members of the general public | Quantitative or qualitative outcomes unrelated to antipsychotic medication-related stigma |
| **Research typea** | Any primary research, including:   - Qualitative research - Quantitative research - Mixed-methods research | - Commentaries - Consensus statements - Correspondence/letters - Corrigenda/errata - Editorials - Clinical guidelines - White papers - Narrative reviews and opinion pieces - Protocols - Blogs, podcasts, webinars, congress proceedings, book reviews - Systematic reviews and meta-analyses (these were hand-searched for relevant primary studies before being excluded) |
| **Other considerations** | - Date limits: - Journal articles (and other full publication types, such as guidelines) published from 2010 onwards - Congress abstracts from 2017 onwards - Studies involving human participants - Publications had to have an abstract, poster, report or full-text article in English. If the full-text article was non-English, the abstract was considered for inclusion in the review in its own right - No geographical restrictions | - Date limits: - Journal articles published before 2010 - Congress abstracts from before 2017 - Studies not involving human participants - Publications not in the English language - Master’s and doctoral theses |

Abbreviations: RCT: randomised controlled trial; MDD: major depressive disorder

aThe pre-specified protocol did not place any restrictions on the study design or publication type. However, due to the large volume of evidence identified at the title/abstract review stage, a post-hoc modification was made to the protocol to apply further eligibility criteria at the full-text review stage. Additional limits were placed on publication type and study design, such that only publications reporting on primary research were eligible for inclusion. This table represents the final eligibility criteria applied in the review.
